# Supplementary material for: KRAS, NRAS, and BRAF mutations are highly enriched in trisomy 12 chronic lymphocytic leukemia and are associated with shorter treatment-free survival
Source: Springer Nature journal article supplement (doi:10.1038/s41375-019-0444-6), 2019-03-14

## Supplemental Materials for

### ***KRAS*, *NRAS*, and *BRAF* Mutations Are Highly Enriched in Trisomy 12 Chronic Lymphocytic Leukemia and Are Associated With Shorter Treatment-Free Survival**

#### **Supplemental information:**

##### **•Supplemental Material and Methods**

##### **• Supplemental Tables:**

- o Table S1. Clinical and laboratory features of CLL patients.
- o Table S2. Cox regression analysis of treatment-free survival of the clinical cohort.
- o Table S3. List of *KRAS*, *NRAS*, and *BRAF* missense point mutations identified in the study cohort.
- o Table S4. Association of *KRAS*, *NRAS*, and *BRAF* mutations with CLL clinico-biological features.
- o Table S5. Cox regression analysis of treatment-free survival in the *IGHV* unmutated/trisomy 12-only/*NOTCH1*-wt subgroup.

##### **• Supplemental Figure Legend**

##### **• Supplemental Figure:**

- o Figure S1. Kaplan-Meier curves of treatment-free survival of CLL patients in the clinical cohort.

## Supplemental Materials and Methods

### Patient characterization

Patient characterization included Rai staging, expression of CD49d (CD49d positive:  $\geq 30\%$ ), CD38 (CD38 positive:  $\geq 30\%$ ) and ZAP-70 (ZAP-70 positive:  $\geq 20\%$ ) and *IGHV* mutational status (UM if  $<$  or equal to 2% mutations from germline sequence). Interphase fluorescent *in situ* hybridization (FISH) on peripheral blood investigated trisomy12, del13q, del11q, del17p; cases bearing each aberration in  $\geq 10\%$  of nuclei were considered abnormal.

### Mutational analysis by targeted next-generation sequencing

*KRAS*, *NRAS*, *BRAF*, *TP53* and *NOTCH1* mutational status was investigated by next generation sequencing (NGS) with an amplicon based strategy. Specific primers for *KRAS*, *NRAS* (hotspot regions in exons 2, 3 and 4), *BRAF* (hotspot regions in exons 11 and 15), *TP53* (exons 2-11) and *NOTCH1* (exon 34 including 3'UTR), were designed with the ION Ampliseq designer (Thermo Scientific, Milan, Italy, <https://www.ampliseq.com/>), checked using the Primer3 program (1;2), and modified according to Illumina (San Diego, CA) protocol adding specific adapter sequences (see (3)). Amplicon libraries were generated using a modified Illumina protocol. Briefly, multiplex PCR products were generated using Phusion High-Fidelity DNA Polymerase (Thermo Scientific) and subsequently tagged with specific index according to modified procedures for NexteraXT (DNALibrary Preparation kit (Illumina)). *BIRC3* and *SF3BI* mutational status was investigated by NGS using an amplicon based strategy coupled with NexteraXT (Illumina). Specific primers for *BIRC3* (exons 6-9) and *SF3BI* (exons 14-18), were designed with the Primer3 program (1;2). Briefly, multiplex PCR products were generated using Phusion High-Fidelity DNA Polymerase (Thermo Scientific) and subsequently processed and indexed with NexteraXT kit according to manufacturer's instructions. Purified libraries were pooled, and paired-end sequenced in a MiSeq instrument (Illumina). The sequencing coverage was at least 1000X.

### Bioinformatic workflow

Sequencing reads were mapped to the human reference genome (GRCh37/hg19) using the Burrows-Wheeler Aligner-MEM algorithm (version 0.7.10) (4). Coverage along the targeted regions was analyzed using SAMtools (version 1.1) (4). Variant calling was performed using the entire pipeline established on the MiSeq Reporter software (MSR; version 2.4.60). Data were analyzed with MiSeq reporter (Illumina) and IGV software (5;6) against human genome assembly GRCh37/hg19. Results

were expressed as percentage of mutated DNA. Cases with >1% mutated DNA were considered mutated. Synonymous variants and polymorphisms described in the Single Nucleotide Polymorphism Database (dbSNP138) removed. All other variants were considered as somatic mutations when they were truncating, affected splicing sites, or were identified as somatic mutations in COSMIC (<http://cancer.sanger.ac.uk/cosmic>), the International Agency for Research on Cancer TP53 database (<http://p53.iarc.fr/>), or The Clinical Knowledgebase (CKB) database (<https://ckb.jax.org/>).

### References to supplemental Materials and Methods

1. Koressaar T, Remm M. Enhancements and modifications of primer design program Primer3. *Bioinformatics*. 2007;23:1289-91.
2. Untergasser A, Cutcutache I, Koressaar T, Ye J, Faircloth BC, Remm M, et al. Primer3--new capabilities and interfaces. *Nucleic Acids Res*. 2012;40:e115.
3. D'Agaro T, Bittolo T, Bravin V, Dal BM, Pozzo F, Bulian P, et al. NOTCH1 mutational status in chronic lymphocytic leukaemia: clinical relevance of subclonal mutations and mutation types. *Br J Haematol*. 2018;182:597-602.
4. Li H, Durbin R. Fast and accurate short read alignment with Burrows-Wheeler transform. *Bioinformatics*. 2009;25:1754-60.
5. Robinson JT, Thorvaldsdottir H, Winckler W, Guttman M, Lander ES, Getz G, et al. Integrative genomics viewer. *Nat Biotechnol*. 2011;29:24-6.
6. Thorvaldsdottir H, Robinson JT, Mesirov JP. Integrative Genomics Viewer (IGV): high-performance genomics data visualization and exploration. *Brief Bioinform*. 2013;14:178-92.

**Table S1. Clinical and laboratory features of CLL patients.**

| Parameter                 | n/total cases | %    |
|---------------------------|---------------|------|
| Gender, male              | 317/534       | 59.4 |
| Age median, years [range] | 64 [31-89]    |      |
| ≥65                       | 210/447       | 47.0 |
| <i>IGHV</i> unmutated     | 332/518       | 64.1 |
| Chromosomal aberrations   |               |      |
| trisomy 12                | 300/534       | 56.2 |
| trisomy 12-only           | 190/534       | 35.6 |
| trisomy 12-plus           | 110/534       | 20.6 |
| del13q                    | 71/534        | 13.3 |
| del11q                    | 17/534        | 3.2  |
| del17p                    | 14/534        | 2.6  |
| del13q and del11q         | 3/534         | 0.6  |
| del13q and del17p         | 5/534         | 0.9  |
| Non-trisomy 12            | 234/534       | 43.8 |
| del13q                    | 94/534        | 17.6 |
| normal                    | 82/534        | 15.4 |
| del11q                    | 16/534        | 3.0  |
| del17p                    | 13/534        | 2.4  |
| other                     | 29/534        | 5.4  |
| <i>NOTCH1</i> mutated     | 214/534       | 40.1 |
| <i>SF3B1</i> mutated      | 30/379        | 7.9  |
| <i>BIRC3</i> mutated      | 69/393        | 17.6 |
| <i>TP53</i> mutated       | 59/534        | 11.0 |
| CD49d positive (≥30%)     | 373/531       | 70.2 |
| CD38 positive (≥30%)      | 285/530       | 53.8 |
| ZAP-70 positive (≥20%)    | 278/465       | 59.8 |
| Rai stage                 |               |      |
| 0-I                       | 315/439       | 71.8 |
| II-III-IV                 | 124/439       | 28.2 |
| Treated                   | 290/442       | 65.6 |

Trisomy 12-only: cases harboring trisomy 12 as the sole chromosomal aberration; trisomy 12-plus: cases harboring trisomy 12 plus other chromosomal aberrations (listed); other: non-trisomy 12 cases harboring multiple chromosomal aberrations among those tested (i.e. del13q and/or plus del11q and/or plus del17p).

**Table S2. Cox regression analysis of treatment-free survival of the clinical cohort.**

|                                                           | Multivariable (n=365) |         |
|-----------------------------------------------------------|-----------------------|---------|
|                                                           | HR (95% CI)           | p-value |
| <i>IGHV</i> unmutated                                     | 1.89 (1.41-2.52)      | <0.0001 |
| <i>TP53</i> disrupted (del17p and/or <i>TP53</i> mutated) | 1.41 (1.01-1.95)      | 0.04    |
| CD49d positive ( $\geq 30\%$ )                            | 1.66 (1.23-2.24)      | 0.001   |
| Rai stage II-III-IV                                       | 2.54 (1.94-3.33)      | <0.0001 |

Multivariable Cox regression analysis was performed by including factors with p-value <0.05 in univariable analysis: *IGHV*, *NOTCH1*, CD49d, *TP53* disrupted, del11q (Döhner classification), *ZAP-70* and Rai stage; HR: hazard ratio; CI: confidence interval. Results are based on the final model after stepwise selection of covariates.

**Table S3. List of *KRAS*, *NRAS*, and *BRAF* missense point mutations identified in the study cohort.**

| Case # | <i>KRAS</i>                                        |                  | <i>NRAS</i>        |         | <i>BRAF</i>                          |          |
|--------|----------------------------------------------------|------------------|--------------------|---------|--------------------------------------|----------|
|        | sequence variation                                 | VAF (%)          | sequence variation | VAF (%) | sequence variation                   | VAF (%)  |
| 1      | c.436G>A p.A146T                                   | 23.3             |                    |         | c.1790T>A p.L597Q                    | 9.0      |
| 2      | c.53C>T p.A18V                                     | 18.8             |                    |         |                                      |          |
| 3      | c.436G>C p.A146P                                   | 3.0              |                    |         |                                      |          |
| 4      | c.436G>C p.A146P                                   | 31.2             |                    |         |                                      |          |
| 5      | c.437C>T p.A146V                                   | 5.7              |                    |         |                                      |          |
| 6      | c.437C>T p.A146V                                   | 6.3              |                    |         | c.1801A>G p.K601E                    | 9.0      |
| 7      | c.437C>T p.A146V                                   | 8.6              |                    |         |                                      |          |
| 8      | c.35G>A p.G12D; c.38G>A p.G13D;<br>c.173C>T p.T58I | 1.8; 2.8;<br>2.8 | c.182A>G p.Q61R    | 1.6     |                                      |          |
| 9      | c.35G>A p.G12D; c.38G>A p.G13D                     | 2.0; 3.4         | c.38G>A p.G13D     | 1.8     |                                      |          |
| 10     | c.35G>A p.G12D                                     | 2.8              |                    |         |                                      |          |
| 11     | c.35G>A p.G12D                                     | 26.2             |                    |         |                                      |          |
| 12     | c.35G>A p.G12D                                     | 32.3             |                    |         |                                      |          |
| 13     | c.34G>C p.G12R                                     | 15.1             |                    |         |                                      |          |
| 14     | c.35G>T p.G12V                                     | 12.7             |                    |         |                                      |          |
| 15     | c.35G>T p.G12V                                     | 5.3              |                    |         |                                      |          |
| 16     | c.35G>T p.G12V; c.38G>A p.G13D                     | 7.9;3.5          |                    |         |                                      |          |
| 17     | c.38G>A p.G13D                                     | 4.6              |                    |         | c.1803A>T p.K601N; c.1790T>G p.L597R | 5.3; 4.0 |
| 18     | c.38G>A p.G13D                                     | 1.3              |                    |         |                                      |          |
| 19     | c.38G>A p.G13D                                     | 2.2              |                    |         | c.1801A>G p.K601E                    | 24.0     |
| 20     | c.38G>A p.G13D; c.182A>T p.Q61L                    | 23.9; 3.3        |                    |         |                                      |          |
| 21     | c.38G>A p.G13D                                     | 28.4             |                    |         |                                      |          |
| 22     | c.38G>A p.G13D                                     | 33.6             |                    |         |                                      |          |
| 23     | c.38G>A p.G13D                                     | 5.7              |                    |         |                                      |          |
| 24     | c.38G>A p.G13D                                     | 6.6              |                    |         |                                      |          |

|    |                                 |          |                                 |           |                                                             |                   |
|----|---------------------------------|----------|---------------------------------|-----------|-------------------------------------------------------------|-------------------|
| 25 | c.350A>G p.K117R                |          |                                 |           |                                                             |                   |
| 26 | c.57G>T p.L19F                  | 3.3      |                                 |           | c.1803A>T p.K601N; c.1801A>G p.K601E ;<br>c.1790T>A p.L597Q | 8.6; 3.3;<br>13.5 |
| 27 | c.57G>T p.L19F                  | 39.9     |                                 |           |                                                             |                   |
| 28 | c.57G>T p.L19F                  | 56.8     |                                 |           |                                                             |                   |
| 29 | c.64C>G p.Q22E <sup>a</sup>     | 2.2      |                                 |           | c.1781A>G p.D594G                                           | 4.4               |
| 30 | c.64C>A p.Q22K                  | 12.4     |                                 |           |                                                             |                   |
| 31 | c.64C>A p.Q22K                  | 14.8     |                                 |           | c.1406G>C p.G469A                                           | 5.9               |
| 32 | c.64C>A p.Q22K                  | 20.4     |                                 |           |                                                             |                   |
| 33 | c.64C>A p.Q22K                  | 8.1      |                                 |           |                                                             |                   |
| 34 | c.183A>C p.Q61H                 | 31.2     |                                 |           |                                                             |                   |
| 35 | c.183A>T p.Q61H                 | 6.3      |                                 |           |                                                             |                   |
| 36 | c.182A>G p.Q61R; c.35G>A p.G12D | 2.0; 1.6 |                                 |           |                                                             |                   |
| 37 | c.173C>T p.T58I                 | 20.7     |                                 |           |                                                             |                   |
| 38 | c.40G>A p.V14I                  | 8.8      |                                 |           | c.1803A>T p.K601N                                           | 16.8              |
| 39 |                                 |          | c.436G>A p.A146T                | 2.1       |                                                             |                   |
| 40 |                                 |          | c.34G>T p.G12C                  | 4.1       |                                                             |                   |
| 41 |                                 |          | c.35G>A p.G12D; c.181C>A p.Q61K | 3.1; 23.3 |                                                             |                   |
| 42 |                                 |          | c.35G>A p.G12D                  | 43.2      |                                                             |                   |
| 43 |                                 |          | c.38G>T p.G13V                  | 22.7      |                                                             |                   |
| 44 |                                 |          | c.181C>A p.Q61K                 | 1.5       |                                                             |                   |
| 45 |                                 |          | c.181C>A p.Q61K; c.38G>A p.G13D | 5.9; 27.3 |                                                             |                   |
| 46 |                                 |          | c.182A>T p.Q61L                 | 1.5       |                                                             |                   |
| 47 |                                 |          | c.182A>G p.Q61R                 | 1.8       | c.1406G>T p.G469V; c.1397G>A p.G466E                        | 10.6; 5.0         |
| 48 |                                 |          | c.182A>G p.Q61R                 | 28.1      |                                                             |                   |
| 49 |                                 |          | c.182A>G p.Q61R                 | 8.3       |                                                             |                   |
| 50 |                                 |          |                                 |           | c.1781A>G p.D594G                                           | 2.6               |
| 51 |                                 |          |                                 |           | c.1781A>G p.D594G; c.1406G>C p.G469A                        | 3.7; 3.7          |

|    |  |  |  |  |                                      |           |
|----|--|--|--|--|--------------------------------------|-----------|
| 52 |  |  |  |  | c.1781A>G p.D594G                    | 6.1       |
| 53 |  |  |  |  | c.1403T>C p.F468S                    | 3.6       |
| 54 |  |  |  |  | c.1397G>A p.G466E                    | 25.3      |
| 55 |  |  |  |  | c.1406G>C p.G469A                    | 31.9      |
| 56 |  |  |  |  | c.1406G>C p.G469A                    | 61.6      |
| 57 |  |  |  |  | c.1406G>A p.G469E                    | 1.6       |
| 58 |  |  |  |  | c.1405G>C p.G469R                    | 34.1      |
| 59 |  |  |  |  | c.1801A>G p.K601E                    | 19        |
| 60 |  |  |  |  | c.1801A>G p.K601E; c.1799T>A p.V600E | 3.2; 29.1 |
| 61 |  |  |  |  | c.1801A>G p.K601E; c.1406G>C p.G469A | 8.0; 4.6  |
| 62 |  |  |  |  | c.1803A>T p.K601N                    | 1.6       |
| 63 |  |  |  |  | c.1803A>T p.K601N                    | 7.7       |
| 64 |  |  |  |  | c.1799T>A p.V600E; c.1406G>C p.G469A | 2.6; 17.6 |

Variations in the coding (c) and protein (p) sequence are annotated. VAF: Variant Allele Fraction. <sup>a</sup>Not in COSMIC database (<https://cancer.sanger.ac.uk/cosmic>) but reported in The Clinical Knowledgebase (CKB) database (<https://ckb.jax.org/>).



**Table S4. Association of *KRAS*, *NRAS*, and *BRAF* mutations with CLL clinico-biological features.**

|                       |                                                  | All cohort |                                                          |                                                            |         | UM <i>IGHV</i> /trisomy 12 cohort |                                                          |                                                            |         |
|-----------------------|--------------------------------------------------|------------|----------------------------------------------------------|------------------------------------------------------------|---------|-----------------------------------|----------------------------------------------------------|------------------------------------------------------------|---------|
|                       |                                                  | Total      | mutated<br><i>KRAS</i> -<br><i>NRAS</i> -<br><i>BRAF</i> | unmutated<br><i>KRAS</i> -<br><i>NRAS</i> -<br><i>BRAF</i> | p-value | Total                             | mutated<br><i>KRAS</i> -<br><i>NRAS</i> -<br><i>BRAF</i> | unmutated<br><i>KRAS</i> -<br><i>NRAS</i> -<br><i>BRAF</i> | p-value |
| <i>IGHV</i>           | unmutated                                        | 332        | 55                                                       | 277                                                        | <0.0001 | -                                 | -                                                        | -                                                          | -       |
|                       | mutated                                          | 186        | 8                                                        | 178                                                        |         | -                                 | -                                                        | -                                                          |         |
| STRUCTURAL<br>VARIANT | trisomy 12                                       | 300        | 51                                                       | 249                                                        | <0.0001 | -                                 | -                                                        | -                                                          | -       |
|                       | non-trisomy 12                                   | 234        | 13                                                       | 221                                                        |         | -                                 | -                                                        | -                                                          |         |
| STRUCTURAL<br>VARIANT | trisomy 12-only                                  | 190        | 41                                                       | 149                                                        | 0.005   | 133                               | 38                                                       | 95                                                         | 0.1     |
|                       | trisomy 12-plus                                  | 110        | 10                                                       | 100                                                        |         | 49                                | 8                                                        | 41                                                         |         |
| <i>NOTCH1</i>         | unmutated                                        | 320        | 43                                                       | 277                                                        | 0.2     | 92                                | 29                                                       | 63                                                         | 0.05    |
|                       | mutated                                          | 214        | 21                                                       | 193                                                        |         | 90                                | 17                                                       | 73                                                         |         |
| <i>SF3B1</i>          | unmutated                                        | 349        | 50                                                       | 299                                                        | 0.4     | 145                               | 41                                                       | 104                                                        | 1       |
|                       | mutated                                          | 30         | 6                                                        | 24                                                         |         | 14                                | 4                                                        | 10                                                         |         |
| <i>BIRC3</i>          | unmutated                                        | 324        | 55                                                       | 269                                                        | 0.02    | 132                               | 41                                                       | 91                                                         | 0.05    |
|                       | mutated                                          | 69         | 4                                                        | 65                                                         |         | 30                                | 4                                                        | 26                                                         |         |
| <i>TP53</i>           | normal                                           | 460        | 55                                                       | 405                                                        | 0.9     | 162                               | 42                                                       | 120                                                        | 0.6     |
|                       | Disrupted (del17p<br>and/or <i>TP53</i> mutated) | 74         | 9                                                        | 65                                                         |         | 20                                | 4                                                        | 16                                                         |         |
| CD49d                 | negative                                         | 158        | 12                                                       | 146                                                        | 0.04    | 23                                | 6                                                        | 17                                                         | 0.9     |
|                       | positive ( $\geq 30\%$ )                         | 373        | 52                                                       | 321                                                        |         | 158                               | 40                                                       | 118                                                        |         |
| CD38                  | negative                                         | 245        | 27                                                       | 218                                                        | 0.2     | 70                                | 17                                                       | 53                                                         | 0.8     |
|                       | positive ( $\geq 30\%$ )                         | 285        | 37                                                       | 248                                                        |         | 111                               | 29                                                       | 82                                                         |         |
| ZAP-70                | negative                                         | 187        | 18                                                       | 169                                                        | 0.2     | 34                                | 7                                                        | 27                                                         | 0.5     |
|                       | positive ( $\geq 20\%$ )                         | 278        | 39                                                       | 239                                                        |         | 131                               | 34                                                       | 97                                                         |         |

|           |           |     |    |     |      |     |    |    |     |
|-----------|-----------|-----|----|-----|------|-----|----|----|-----|
| Rai stage | 0-I       | 315 | 42 | 273 | 0.5  | 114 | 32 | 82 | 0.4 |
|           | II-III-IV | 124 | 14 | 110 |      | 38  | 8  | 30 |     |
| age       | <65       | 237 | 24 | 213 | 0.07 | 73  | 17 | 56 | 0.4 |
|           | ≥65       | 210 | 33 | 177 |      | 84  | 24 | 60 |     |
| gender    | male      | 317 | 37 | 280 | 0.8  | 115 | 26 | 89 | 0.3 |
|           | female    | 217 | 27 | 190 |      | 67  | 20 | 47 |     |

The association between recurrent mutations and the other clinical and biological prognosticators was calculated using the chi-square test. Trisomy 12-only: cases harboring trisomy 12 as the sole chromosomal aberration; trisomy 12-plus: cases harboring trisomy 12 plus other chromosomal aberrations (del13q = 71 cases; del11q = 17 cases; del17p = 14 cases; del13q and del17p = 5 cases; del13q and del11q = 3 cases); non-trisomy 12: cases harboring other chromosomal aberrations than trisomy 12 or none.

**Table S5. Cox regression analysis of treatment-free survival in the *IGHV* unmutated/trisomy 12-only/*NOTCH1*-wt subgroup.**

|                                                           | N pts analyzed | Univariable       |         | Multivariable (n=57) |         |
|-----------------------------------------------------------|----------------|-------------------|---------|----------------------|---------|
|                                                           |                | HR (95% CI)       | p-value | HR (95% CI)          | p-value |
| <i>KRAS</i> mutated                                       | 61             | 2.99 (1.36-6.57)  | 0.006   | 2.88 (1.28-6.48)     | 0.01    |
| <i>NRAS</i> mutated                                       | 61             | 1.31 (0.51-3.44)  | 0.6     | –                    | –       |
| <i>BRAF</i> mutated                                       | 61             | 0.92 (0.28-3.00)  | 0.9     | –                    | –       |
| <i>KRAS/NRAS</i> mutated                                  | 61             | 1.97 (1-3.89)     | 0.05    | –                    | –       |
| <i>SF3B1</i> mutated                                      | 60             | 2.92 (1.19-7.17)  | 0.02    | n.i.                 | n.i.    |
| <i>BIRC3</i> mutated                                      | 60             | 0.69 (0.27-1.76)  | 0.4     | –                    | –       |
| <i>TP53</i> disrupted (del17p and/or <i>TP53</i> mutated) | 61             | 1.47 (0.20-10.91) | 0.7     | –                    | –       |
| CD49d positive ( $\geq 30\%$ )                            | 61             | 1.30 (0.46-3.66)  | 0.6     | –                    | –       |
| CD38 positive ( $\geq 30\%$ )                             | 61             | 0.59 (0.31-1.11)  | 0.1     | –                    | –       |
| ZAP-70 positive ( $\geq 20\%$ )                           | 58             | 0.99 (0.48-2.01)  | 1.0     | –                    | –       |
| Rai stage II-III-IV                                       | 58             | 2.77 (1.28-5.98)  | 0.01    | 2.70 (1.24-5.88)     | 0.012   |
| age $\geq 65$                                             | 61             | 1.52 (0.78-2.96)  | 0.2     | –                    | –       |

Factors with p-value  $<0.05$  in univariable analysis were entered in the multivariable analysis; HR: hazard ratio; CI: confidence interval; n.i.: variables not included in the model after stepwise selection.

## Supplemental Figure Legend

**Figure S1. Kaplan-Meier curves of treatment-free survival of CLL patients in the clinical cohort.** Kaplan-Meier curves of treatment-free survival of CLL patients stratified by the presence of main CLL prognosticators: Döhner hierarchical cytogenetic classification (442 cases); *TP53* disruption (del17p and/or *TP53* mutated, 442 cases); *IGHV* mutational status (428 cases); CD49d expression (positive  $\geq 30\%$ , 442 cases); Rai stage (434 cases); *NOTCH1* mutational status (442 cases); ZAP-70 expression (positive  $\geq 20\%$ , 389 cases).

# Supplemental Figure 1

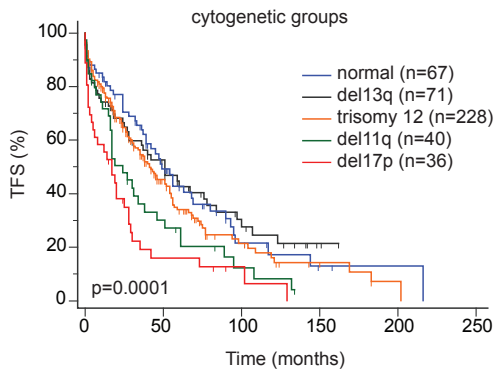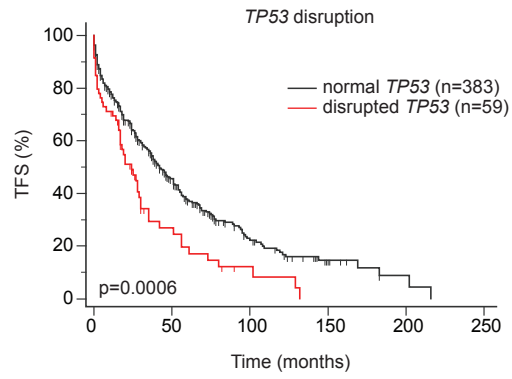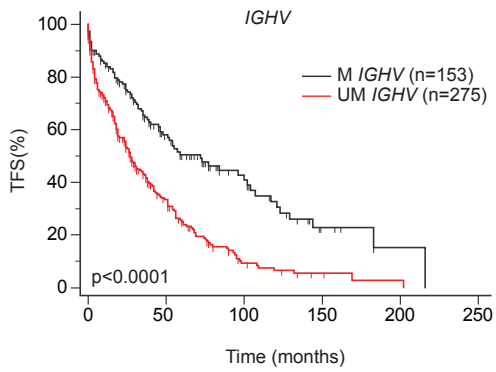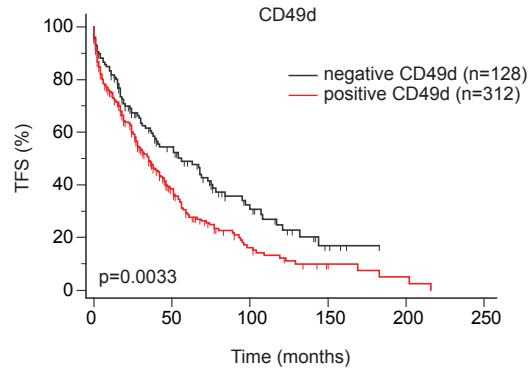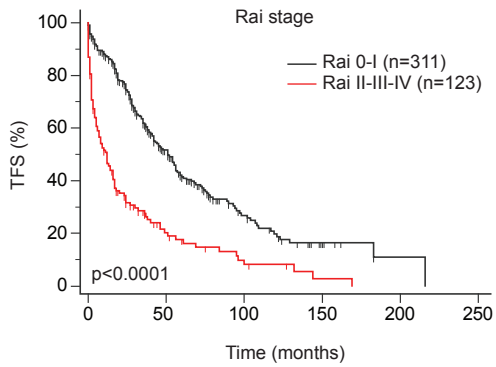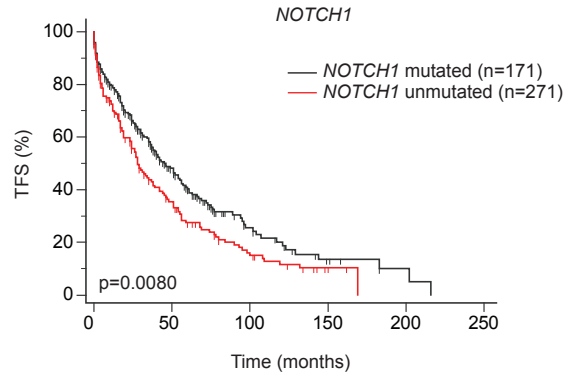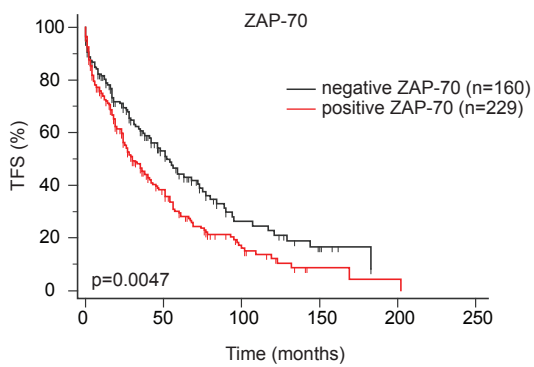

Supplement: MOESM1 [file 41375_2019_444_MOESM1_ESM%281%29.pdf]
